# Supplementary material for: Variable maternal methylation overlapping the nc886/vtRNA2-1 locus is locked between hypermethylated repeats and is frequently altered in cancer
Source: PubMed Central journal article supplement — Epigenetics. 2014 Mar 3;9(5):783–90. doi: 10.4161/epi.28323 (PMC4063837; doi:10.4161/epi.28323), 2014-03-03
Supplement: epi-9-783-s01.pdf [file epi-9-783-s01.pdf]

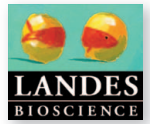

## **Supplemental Material to:**

**Valeria Romanelli, Kazuhiko Nakabayashi,  
Miguel Vizoso Patino, Sebastian Moran,  
Isabel Iglesias-Platas, Naoko Sugahara,  
Carlos Simón, Kenichiro Hata, Manel Esteller,  
Franck Court, and David Monk**

**Variable maternal methylation overlapping the nc886/  
vtRNA2-1 locus is locked between hypermethylated  
repeats and is frequently altered in cancer**

**Epigenetics 2014; 9(5)**

**<http://dx.doi.org/10.4161/epi.28323>**

**[http://www.landesbioscience.com/journals/epigenetics/  
article/28323/](http://www.landesbioscience.com/journals/epigenetics/article/28323/)**

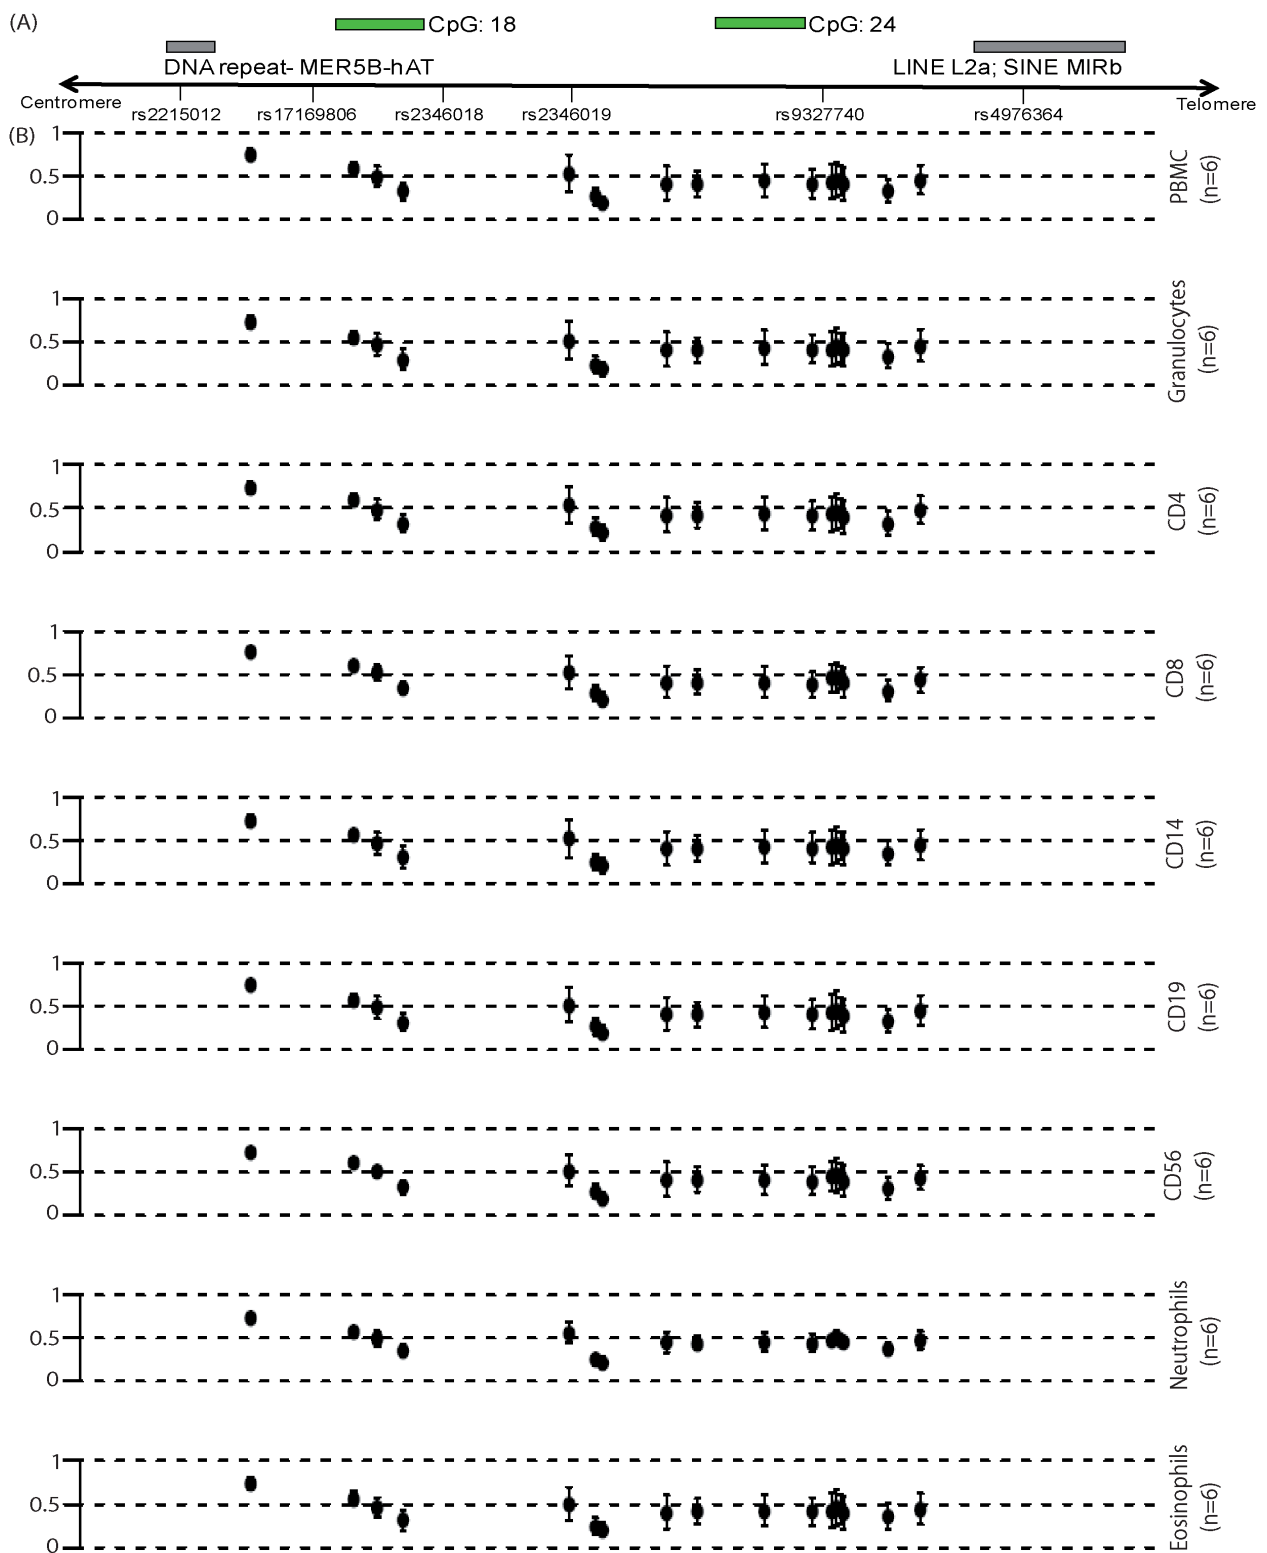

**Supplementary Figure 1. Confirming the allelic methylation profile in immunoselected blood lineages.** (A) Map of the *nc886* locus and (B) Detailed methylation profile of peripheral blood mononucleated cells (PBMCs), granulocytes, CD4, CD8, CS14, CD19, CD14, CD56, neutrophils and eosinophil cells as determined by Infinium HumanMethylation450 beadChip arrays. The data points represent the average of 6 individual cell enrichments and the bars give the range of methylation.
